# Supplementary material for: Inhibiting the redox function of APE1 suppresses cervical cancer metastasis via disengagement of ZEB1 from E-cadherin in EMT
Source: PubMed Central journal article supplement (PMC8246661; doi:10.1186/s13046-021-02006-5), 2021-07-01
Supplement: 13046_2021_2006_MOESM2_ESM.pdf [file 13046_2021_2006_MOESM2_ESM.pdf]

### E-cadherin promoter region

-250 GGC GGGGCTG GGATT CGA ACC CAGT GGAAT CAGA ACC GTGCAGG **TCCCAT**  
-200 **AACC** CACCT **AGACCCTAGCA** ACTCCAGGCTAGAGGGTCACCGCGTCTATG  
-150 CGAGGCCGGGTGGGCGGGCCGTCAGCTCCGCCCTGGGGAGGGGTCCGCGC  
-100 TGCTGATTGGCTGTGGCCGGCAGGTGAACCCTCAGCCAATCAGCGGTACG  
-50 GGGGGCGGTGC**CTCCGGGGCT** CACCT **GGCTGCAGCCACGCACCCCTCTC**

: ZEB1 binding site; Red: EMSA probe

Fig. S1

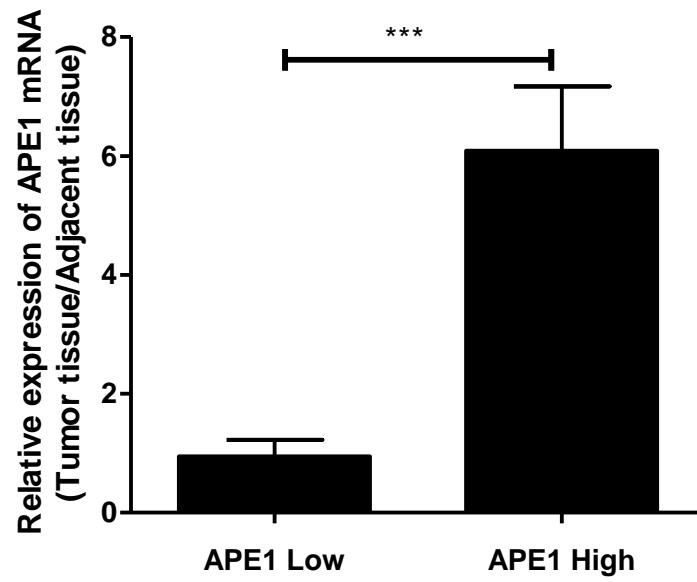

Fig. S2

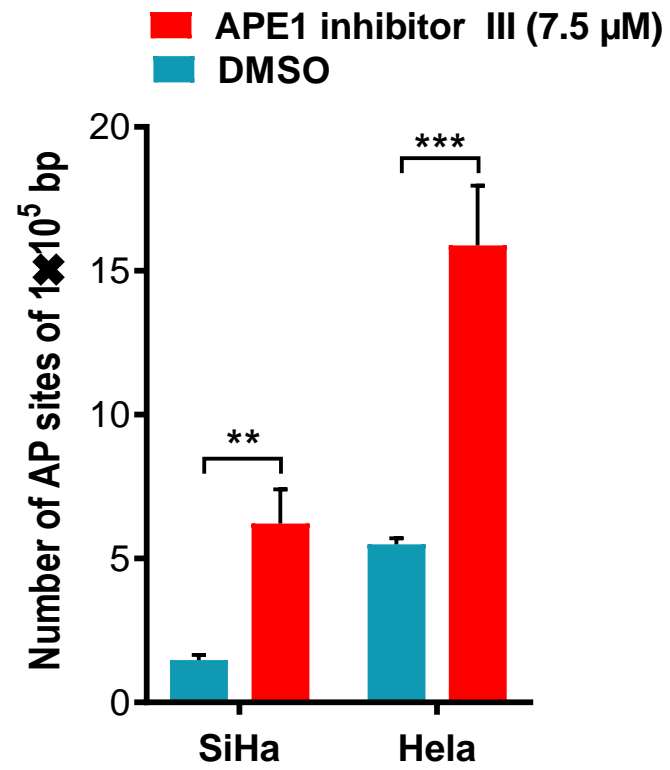

Fig. S3



561 TGDGNLSPSQ PPLKNLLSLL KAYYALNAQP **Wild type**  
561 TGDGNLSPSQ PPLKNLL**PIV** KAYYALNAQP **Mutant**

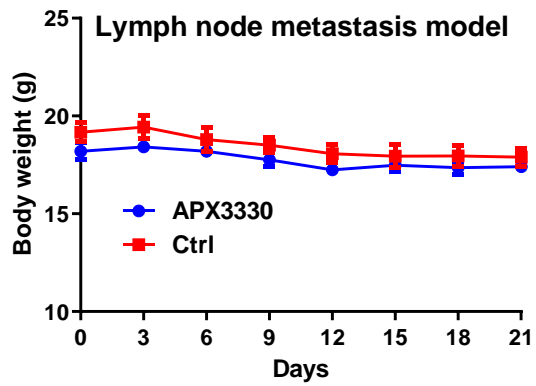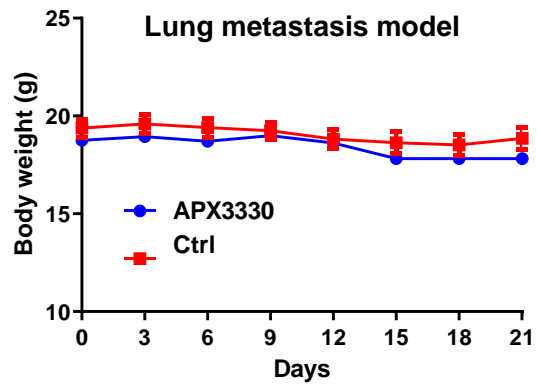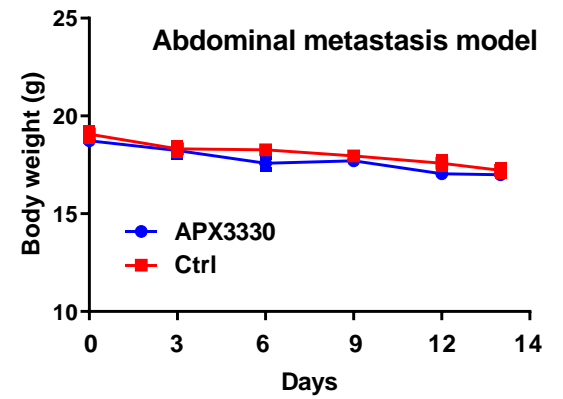

Fig. S6
